# Supplementary material for: Discovering Social Determinants of Health from Case Reports using Natural Language Processing: Algorithmic Development and Validation
Source: bioRxiv or medRxiv preprint supplement (doi:10.1101/2022.11.30.22282946), 2023-06-22
Supplement: Supplementary file [file media-1.pdf]

# Discovering Social Determinants of Health from Case Reports using Natural Language Processing: Algorithmic Development and Validation

Shaina Raza <sup>1,2\*</sup>; Elham Dolatabadi <sup>1,3</sup>, Nancy Ondrusek<sup>1,2</sup>, , Laura Rosella<sup>2</sup>, Brian Schwartz<sup>1,2</sup>

<sup>1</sup> Public Health Ontario (PHO), Toronto, ON, Canada.

<sup>2</sup> Dalla Lana School of Public Health, University of Toronto, Toronto, ON, Canada.

<sup>3</sup> Institute of Health Policy, Management and Evaluation (IHPE), University of Toronto, Toronto, ON, Canada.

Corresponding Author:

Shaina Raza, PhD

Email: [shaina.raza@oahpp.ca](mailto:shaina.raza@oahpp.ca)

## Appendix 1

**Table S1:** *Named entities*

| Clinical entities          | Non-clinical entities (including SDOHs) |
|----------------------------|-----------------------------------------|
| 1. HEART_DISEASE           | 27. GENDER                              |
| 2. CLINICAL_DEPARTMENT     | 28. HEIGHT                              |
| 3. BLOOD_PRESSURE          | 29. AGE                                 |
| 4. DISEASE_SYNDROME        | 30. DATE                                |
| 5. DOSAGE                  | 31. RACE_ETHNICITY                      |
| 6. TREATMENT               | 32. EMPLOYMENT                          |
| 7. TEST                    | 33. SMOKING                             |
| 8. PSYCHOLOGICAL_CONDITION | 34. ADMISSION_DISCHARGE                 |
| 9. SYMPTOM                 | 35. ALCOHOL                             |
| 10. RESPIRATION            | 36. SUBSTANCE                           |
| 11. INTERNAL_BODY_PART     | 37. WEIGHT                              |
| 12. EXTERNAL_BODY_PART     | 38. RELATIVE_DATE                       |
| 13. ONCOLOGICAL            | 39. DURATION                            |
| 14. PROCEDURE              | 40. TIME                                |
| 15. DIABETES               |                                         |
| 16. DRUG_NAME              |                                         |
| 17. VACCINE                |                                         |
| 18. HYPERLIPIDEMIA         |                                         |
| 19. HYPERTENSION           |                                         |
| 20. DEATH_ENTITY           |                                         |
| 21. RESPIRATION            |                                         |
| 22. KIDNEY_DISEASE         |                                         |
| 23. OBESITY                |                                         |
| 24. BMI                    |                                         |
| 25. PULSE                  |                                         |
| 26. INJURY_OR_POISONING    |                                         |

**Figure S1:** Named entities extracted from the case report.

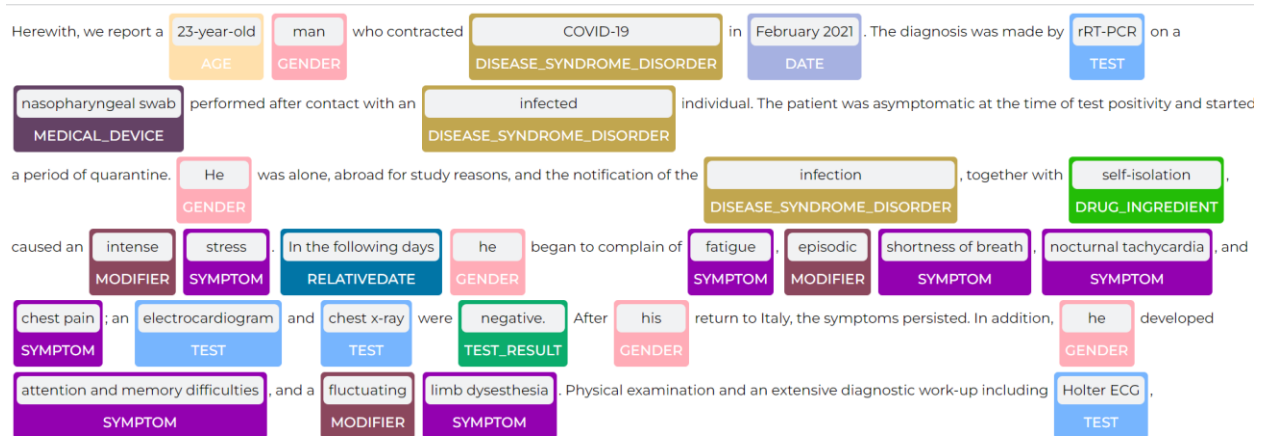

**Table S2:** General Hyperparameters used along with best value and range in parenthesis.

| Hyperparameter            | Value                                                  |
|---------------------------|--------------------------------------------------------|
| LSTM state size           | 200 [200 - 300]                                        |
| dropout rate              | 0.5 [0.2 - 0.7]                                        |
| Epochs                    | 40 [20- 80]                                            |
| Batch size                | 16 [8 - 128]                                           |
| Learning rate (lr)        | 1.e-05 [1.e-9 - 1.e-2]                                 |
| lr decay coefficient (po) | 0.005 [0.001, 0.01]                                    |
| Warmup steps              | 10,000                                                 |
| Optimizer                 | ADAM <sup>58</sup> , $\beta_1=0.9$ and $\beta_2=0.999$ |
| Word dimension            | 300 [50 - 450]                                         |
| Hidden size LSTM          | 300                                                    |
| Gradient clipping         | 5.0                                                    |

The fine-tuning transformer-based architectures (BioBERT and others) are maximum sequence length of 128, number of layers as 12, number of attention heads also 12 and embedding size as 768. For different datasets, the fine-tuning takes different hours (2 hours, 3 hours, 4 hours and 10 hours for our dataset). In the NER task, we fixed the length of sentences to 512. Other hyperparameters used in the paper are given in Table 2.

**Figure S2:** Hospitalization, ICU admission, and mortality in COVID-19 patients with different age groups.

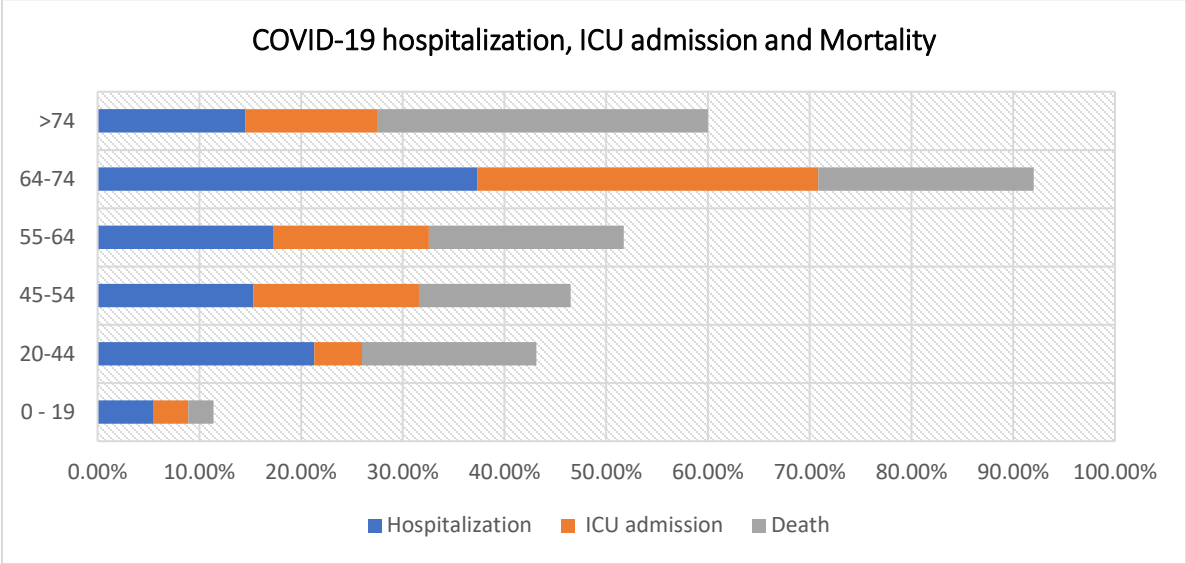

In Figure S2, we observe that, while the mortality rate in older adults (age>74) is 32.50%, the hospitalization and ICU admission rates (14.50% and 12.98%, respectively) are lower than in other age groups.
